# Supplementary material
Source: PubMed Central journal article supplement (PMC6291361)
Supplement: NIHMS999802-supplement-Supp_TableS1.pdf [file NIHMS999802-supplement-Supp_TableS1.pdf]

| Figure                   | Experiment                                | Age of subjects | Sex    | Air val/val animals(litters)         | EtOH val/val animals(litters)       | Air met/met animals(litters)         | EtOH met/met animals(litters)        |
|--------------------------|-------------------------------------------|-----------------|--------|--------------------------------------|-------------------------------------|--------------------------------------|--------------------------------------|
| Figure 1abc              | Hippocampal volume measurement            | P15             | Female | 8(6)                                 | 8(4)                                | 8(6)                                 | 8(5)                                 |
| Figure 1def              | Hippocampal volume measurement            | P15             | Male   | 8(6)                                 | 8(5)                                | 8(6)                                 | 8(7)                                 |
| Figure 2abcd             | Zero maze                                 | ~P80            | Female | 26(10)                               | 13(5)                               | 8(4)                                 | 10(4)                                |
| Figure 2efgh             | Zero maze                                 | ~P80            | Male   | 22(10)                               | 18(7)                               | 16(5)                                | 17(5)                                |
| Figure 3abcd             | Regular trace fear conditioning           | ~P90            | Female | 10(6)                                | 10(5)                               | 10(4)                                | 10(5)                                |
| Figure 3efgh             | Regular trace fear conditioning           | ~P90            | Male   | 10(5)                                | 10(5)                               | 10(3)                                | 10(4)                                |
| Figure 4abcd             | Modified trace fear conditioning          | ~P90            | Female | 11(5)                                | 15(7)                               | 12(5)                                | 15(7)                                |
| Figure 4efgh             | Modified trace fear conditioning          | ~P90            | Male   | 11(5)                                | 17(8)                               | 10(4)                                | 12(4)                                |
| Figure 5 ab              | Doublecortin cell density measurement     | ~P90            | Male   | 10(5)                                | 10(6)                               | 10(4)                                | 10(4)                                |
| Supplemental figure 1a   | Dam blood ethanol concentration (GD17-18) | Adult dams      | Female | N/A                                  | 4                                   | N/A                                  | 4                                    |
| Supplemental figure 1b   | Pup blood ethanol concentration (P7)      | P7              | Both   | N/A                                  | 25(4)                               | N/A                                  | 20(4)                                |
| Supplemental figure 2a   | Pup weights during early development      | P2,5,10,15      | Both   | P2:(13); P5:(13); P10:(13); P15:(13) | P2:(10); P5:(10); P10:(10); P15:(8) | P2:(14); P5:(14); P10:(12); P15:(11) | P2:(19); P5:(19); P10:(15); P15:(12) |
| Supplemental figure 2b   | Animal weights at P50                     | P50             | Both   | ♀:14(7); ♂:24(8)                     | ♀:20(12); ♂:12(12)                  | ♀:21(19); ♂:25(12)                   | ♀:21(9); ♂:21(16)                    |
| Supplemental figure 2b   | Animal weights at P90                     | P90             | Both   | ♀:30(16); ♂:31(15)                   | ♀:21(12); ♂:31(13)                  | ♀:23(6); ♂:22(5)                     | ♀:13(10); ♂: 24(12)                  |
| Supplemental figure 2c   | Developmental milestone acquisition       | P3-P18          | Both   | (13)                                 | (7)                                 | (7)                                  | (9)                                  |
| Supplemental figure 3abc | Hippocampal volume measurement            | P50             | Female | 8(5)                                 | 8(4)                                | 8(7)                                 | 8(5)                                 |
| Supplemental figure 3def | Hippocampal volume measurement            | P50             | Male   | 8(7)                                 | 8(5)                                | 8(7)                                 | 8(5)                                 |
| Supplemental figure 4ac  | Regular trace fear shock reactivity       | P90             | Female | 10(6)                                | 10(5)                               | 10(4)                                | 10(5)                                |
| Supplemental figure 4bd  | Regular trace fear shock reactivity       | P90             | Male   | 10(5)                                | 10(5)                               | 10(3)                                | 10(4)                                |
| Supplemental figure 4eg  | Modified trace fear shock reactivity      | P90             | Female | 11(5)                                | 15(7)                               | 12(5)                                | 15(7)                                |
| Supplemental figure 4fh  | Modified trace fear shock reactivity      | P90             | Male   | 11(5)                                | 17(8)                               | 10(4)                                | 12(4)                                |

**Supplemental Table 1.** The number of animals for each experimental group from the Figures and supplemental Figures are presented, with the number of litters the animals came from in parentheses.
