# Supplementary material
Source: PubMed Central journal article supplement (PMC6291361)
Supplement: NIHMS999802-supplement-Supp_TableS2.pdf [file NIHMS999802-supplement-Supp_TableS2.pdf]

| Figure                                          | p, F, np2 stats: Interaction-<br>Genotype X Exposure  | p, F, np2 stats: Genotype                            | p, F, np2 stats: Exposure                             | Multiple comparison Sidak adjusted<br>p value with 95% CI and Hedges' g : | Multiple comparison Sidak adjusted<br>p value with 95% CI and Hedges' g : | Multiple comparison Sidak adjusted<br>p value with 95% CI and Hedges' g : |
|-------------------------------------------------|-------------------------------------------------------|------------------------------------------------------|-------------------------------------------------------|---------------------------------------------------------------------------|---------------------------------------------------------------------------|---------------------------------------------------------------------------|
|                                                 |                                                       |                                                      |                                                       | Exposure effect in val/val                                                | Exposure effect in met/met                                                | Genotype effect in air exposed<br>animals                                 |
| 1a<br>CA1 volume (P15)<br>Female                | <b>p = 0.0066*</b><br>F(1,28) = 8.622,<br>np2 = 0.235 | p = 0.1935<br>F(1,28) = 1.770<br>np2 = 0.06          | p = 0.4608<br>F(1,28) = 0.4608<br>np2 = 0.020         | p = 0.2483<br>CI = -96011650 to 20019400<br>g = 0.61                      | <b>p = 0.0289*</b><br>CI = 5949225 to 121980275<br>g = 1.62               | p = 0.4618<br>CI = -85863150 to 30167900<br>g = 0.63                      |
| 1b<br>CA3 volume (P15)<br>Female                | p = 0.0741<br>F(1,28) = 3.443<br>np2 = 0.11           | p = 0.2018<br>F(1,28) = 1.7090<br>np2 = 0.058        | p = 0.5450<br>F(1,28) = 0.3754<br>np2 = 0.013         | p = 0.6241<br>CI = -81112898 to 37128648<br>g = 0.4                       | p = 0.1753<br>CI = -15448898 to 102792648<br>g = 0.87                     | p = 0.9107<br>CI = -68824023 to 49417523<br>g = 0.21                      |
| 1c<br>DG volume (P15)<br>Female                 | <b>p = 0.0177*</b><br>F(1,28) = 6.356<br>np2 = 0.185  | p = 0.4974<br>F(1,28) = 0.4727<br>np2 = 0.017        | p = 0.2364<br>F(1,28) = 1.464<br>np2 = 0.050          | p = 0.5927<br>CI = -112220442 to 48970442<br>g = 0.41                     | <b>p = 0.0267*</b><br>CI = 9400683 to 170591567<br>g = 1.33               | p = 0.3686<br>CI = -124822067 to 36368817<br>g = 0.62                     |
| 1d<br>CA1 volume (P15)<br>Male                  | <b>p = 0.0080**</b><br>F(1,28) = 8.153<br>np2 = 0.091 | p = 0.1053<br>F(1,28) = 2.802<br>np2 = 0.091         | p = 0.1988<br>F(1,28) = 1.732<br>np2 = 0.058          | p = 0.4898<br>CI = -74600381 to 27545631<br>g = 0.64                      | <b>p = 0.0127*</b><br>CI = 12684619 to 114830631<br>g = 1.19              | p = 0.6526<br>CI = -69131381 to 33014631<br>g = 0.38                      |
| 1e<br>CA3 volume (P15)<br>Male                  | <b>p = 0.0304*</b><br>F(1,28) = 5.200<br>np2 = 0.157  | <b>p = 0.0470*</b><br>F(1,28) = 4.316<br>np2 = 0.134 | p = 0.5437<br>F(1,28) = 0.378<br>np2 = 0.013          | p = 0.4358<br>CI = -68874907 to 23054407<br>g = 0.58                      | p = 0.0978<br>CI = -6140407 to 85788907<br>g = 0.93                       | p = 0.9872<br>CI = -48753532 to 43175782<br>g = 0.07                      |
| 1f<br>DG volume (P15)<br>Male                   | p = 0.3004<br>F(1,28) = 1.1130<br>np2 = 0.038         | p = 0.1157<br>F(1,28) = 2.636<br>np2 = 0.086         | p = 0.3113<br>F(1,28) = 1.063<br>np2 = 0.037          | p = 0.9998<br>CI = -78757971 to 77632796<br>g = 0.01                      | p = 0.2797<br>CI = -29371259 to 127019509<br>g = 0.62                     | p = 0.9044<br>CI = -64894759 to 91496009<br>g = 0.21                      |
| 2a- Zero maze<br>Time in open arms %<br>Female  | p = 0.0861<br>F(1,53) = 3.058<br>np2 = 0.055          | p = 0.9666<br>F(1,53) = 0.001<br>np2 < 0.001         | p = 0.4672<br>F(1,53) = 0.5362<br>np2 = 0.010         | p = 0.6238<br>CI = -11.46 to 5.157<br>g = 0.26                            | p = 0.2483<br>CI = -3.911 to 19.29<br>g = 0.92                            | p = 0.3631<br>CI = -15.44 to 4.337<br>g = 0.54                            |
| 2b- Zero maze<br>Open time frequency<br>Female  | p = 0.5647<br>F(1,53) = 0.3358<br>np2 = 0.006         | p = 0.7405<br>F(1,53) = 0.1108<br>np2 = 0.002        | p = 0.6499<br>F(1,53) = 0.2083<br>np2 = 0.004         | p = 0.6127<br>CI = -14.35 to 6.348<br>g = 0.27                            | p = 0.9964<br>CI = -13.98 to 14.93<br>g = 0.05                            | p = 0.9803<br>CI = -13.27 to 11.37<br>g = 0.08                            |
| 2c- Zero maze<br>Total distance moved<br>Female | p = 0.8745<br>F(1,53) = 0.0252<br>np2 < 0.001         | <b>p = 0.0447*</b><br>F(1,53) = 4.226<br>np2 = 0.074 | p = 0.4861<br>F(1,53) = 0.4921<br>np2 = 0.009         | p = 0.8725<br>CI = -1856 to 1231<br>g = 0.12                              | p = 0.8392<br>CI = -2651 to 1660<br>g = 0.66                              | p = 0.2186<br>CI = -561.8 to 3113<br>g = 0.81                             |
| 2d- Zero maze<br>Velocity<br>Female             | p = 0.9254<br>F(1,53) = 0.0088<br>np2 < 0.001         | <b>p = 0.0355*</b><br>F(1,53) = 4.655<br>np2 = 0.081 | p = 0.4665<br>F(1,53) = 0.5381<br>np2 = 0.010         | p = 0.8279<br>CI = -6.531 to 4.015<br>g = 0.14                            | p = 0.8502<br>CI = -8.992 to 5.735<br>g = 0.65                            | p = 0.2082<br>CI = -1.846 to 10.71<br>g = 0.85                            |
| 2e- Zero maze<br>Time in open arms %<br>Male    | p = 0.3536<br>F(1,69) = 0.8721<br>np2 = 0.012         | p = 0.5511<br>F(1,69) = 0.3589<br>np2 = 0.005        | <b>p = 0.0012**</b><br>F(1,69) = 11.36<br>np2 = 0.141 | p = 0.1443<br>CI = -15.54 to 1.815<br>g = 0.59                            | <b>p = 0.0096**</b><br>CI = -21.63 to -2.611<br>g = 0.94                  | p = 0.4746<br>CI = -4.654 to 13.29<br>g = 0.36                            |
| 2f- Zero maze<br>Open time frequency<br>Male    | p = 0.5738<br>F(1,69) = 0.3194<br>np2 = 0.005         | p = 0.9949<br>F(1,69) < 0.0001<br>np2 = <0.001       | <b>p = 0.0107*</b><br>F(1,69) = 6.877<br>np2 = 0.091  | p = 0.2458<br>CI = -17.68 to 3.524<br>g = 0.47                            | p = 0.0677<br>CI = -22.58 to 0.6537<br>g = 0.76                           | p = 0.8995<br>CI = -8.992 to 12.92<br>g = 0.13                            |
| 2g- Zero maze<br>Total distance moved<br>Male   | p = 0.5837<br>F(1,69) = 0.3032<br>np2 = 0.004         | <b>p = 0.0226*</b><br>F(1,69) = 5.439<br>np2 = 0.073 | p = 0.1110<br>F(1,69) = 2.606<br>np2 = 0.036          | p = 0.6783<br>CI = -947.2 to 461.1<br>g = 0.27                            | p = 0.2730<br>CI = -1266 to 277.1<br>g = 0.46                             | p = 0.0829<br>CI = -69.28 to 1387<br>g = 0.65                             |
| 2h- Zero maze<br>Velocity<br>Male               | p = 0.6055<br>F(1,69) = 0.2693<br>np2 = 0.004         | <b>p = 0.0131*</b><br>F(1,69) = 6.488<br>np2 = 0.086 | p = 0.1075<br>F(1,69) = 2.66<br>np2 = 0.037           | p = 0.6546<br>CI = -3.216 to 1.511<br>g = 0.28                            | p = 0.2778<br>CI = -4.239 to 0.9416<br>g = 0.46                           | p = 0.0613<br>CI = -0.09196 to 4.795<br>g = 0.70                          |
| 5a<br>DCX cell density<br>Dorsal GCL            | p = 0.1516<br>F(1,36) = 2.146<br>np2 = 0.056          | p = 0.2639<br>F(1,36) = 1.288<br>np2 = 0.035         | p = 0.7486<br>F(1,36) = 0.1043<br>np2 = 0.003         | p = 0.6690<br>CI = -6.659e-006 to 3.235e-006<br>g = 0.42                  | p = 0.3826<br>CI = -2.267e-006 to 7.628e-006<br>g = 0.47                  | p = 0.9664<br>CI = -5.442e-006 to 4.452e-006<br>g = 0.09                  |
| 5b<br>DCX cell density<br>Ventral GCL           | p = 0.2118<br>F(1,36) = 1.616<br>np2 = 0.043          | <b>p = 0.0161*</b><br>F(1,36) = 6.384<br>np2 = 0.151 | <b>p = 0.0393*</b><br>F(1,36) = 4.577<br>np2 = 0.113  | <b>p = 0.0418*</b><br>CI = 1.33e-007 to 8.071e-006<br>g = 0.96            | p = 0.7913<br>CI = -2.925e-006 to 5.013e-006<br>g = 0.29                  | <b>p = 0.0216*</b><br>CI = 5.987e-007 to 8.536e-006<br>g = 1.12           |

**Supplemental Table 2.** Detailed statistics from BDNF genotype X exposure condition two-way ANOVAs from Figures 1, 2, and 5. The BDNF genotype X exposure interaction, genotype, and exposure p values and F ratios are presented. Post-hoc analysis of exposure condition within BDNF genotype, as well as of genotype effect within air exposed animals are also presented, with Sidak multiplicity adjusted p values and 95% confidence intervals.
