# Supplementary material
Source: PubMed Central journal article supplement (PMC6291361)
Supplement: NIHMS999802-supplement-Supp_TableS3.pdf [file NIHMS999802-supplement-Supp_TableS3.pdf]

| Figure                                         | p, F, np2 stats: Interaction (Time X Exposure)               | p, F, np2 stats: Exposure                            | Significant Exposure effects at specific time points from multiple comparisons | Multiple comparison Sidak adjusted p value with 95% CI and Hedges' g :<br>Exposure effect within genotype |
|------------------------------------------------|--------------------------------------------------------------|------------------------------------------------------|--------------------------------------------------------------------------------|-----------------------------------------------------------------------------------------------------------|
| Fig 3a<br>Reg trace training<br>Female Val/Val | p = 0.807<br>F(4,633,83.391) = 0.439<br>np2 = 0.024          | p = 0.7472<br>F(1,18) = 0.1072<br>np2 = 0.006        | None                                                                           | No significant effects                                                                                    |
| Fig 3b<br>Reg trace test<br>Female Val/Val     | p = 0.289<br>F(2,578,46.401) = 1.289<br>np2 = 0.067          | p = 0.1862<br>F(1,18) = 1.889<br>np2 = 0.095         | 340s                                                                           | <b>p = 0.0027**</b><br>CI = 5.144 to 43.74<br>g = 0.69                                                    |
| Fig 3c<br>Reg trace training<br>Female Met/Met | p = 0.512<br>F(5,976,107.564) = 0.88<br>np2 = 0.047          | p = 0.7485<br>F(1,18) = 0.106<br>np2 = 0.006         | None                                                                           | No significant effects                                                                                    |
| Fig 3d<br>Reg trace test<br>Female Met/Met     | <b>p = 0.037*</b><br>F(4,449,80.074) = 2.605<br>np2 = 0.126  | p = 0.0976<br>F(1,18) = 3.053<br>np2 = 0.145         | 220s                                                                           | <b>p = 0.0010**</b><br>CI = 7.778 to 53.07<br>g = 0.91                                                    |
|                                                |                                                              |                                                      | 340s                                                                           | <b>p = 0.0013**</b><br>CI = 7.303 to 52.6<br>g = 1.18                                                     |
|                                                |                                                              |                                                      | 360s                                                                           | <b>p = 0.0082**</b><br>3.878 to 49.17<br>g = 1.08                                                         |
| Fig 3e<br>Reg trace training<br>Male Val/Val   | p = 0.635<br>F(4,755,85.584) = 0.676<br>np2 = 0.036          | p = 0.3908<br>F(1,18) = 0.7733<br>np2 = 0.041        | None                                                                           | No significant effects                                                                                    |
| Fig 3f<br>Reg trace test<br>Male Val/Val       | p = 0.866<br>F(1,713,30.84) = 0.111<br>np2 = 0.006           | p = 0.7646<br>F(1,18) = 0.09244<br>np2 = 0.005       | None                                                                           | No significant effects                                                                                    |
| Fig 3g<br>Reg trace training<br>Male Met/Met   | p = 0.107<br>F(4,443,79.975) = 1.928<br>np2 = 0.097          | <b>p = 0.0139*</b><br>F(1,28) = 7.42<br>np2 = 0.292  | 4th intertone                                                                  | <b>p = 0.0033**</b><br>CI = 6.796 to 57.61<br>g = 2.05                                                    |
| Fig 3h<br>Reg trace test<br>Male met/met       | <b>p = 0.028*</b><br>F(3,409,61.364) = 3.081<br>np2 = 0.146  | <b>p = 0.0451*</b><br>F(1,18) = 4.638<br>np2 = 0.205 | 200s                                                                           | <b>p = 0.0011**</b><br>CI = 6.817 to 47.21<br>g = 1.07                                                    |
|                                                |                                                              |                                                      | 220s                                                                           | <b>p = 0.0002***</b><br>CI = 9.422 to 49.82<br>g = 0.82                                                   |
|                                                |                                                              |                                                      | 340s                                                                           | <b>p &lt; 0.0001****</b><br>CI = 10.56 to 50.95<br>g = 1.02                                               |
| Fig 4a<br>Mod trace training<br>Female Val/Val | p = 0.822<br>F(6,262,150.279) = 0.49<br>np2 = 0.02           | p = 0.9354<br>F(1,24) = 0.006705<br>np2 < 0.001      | None                                                                           | No significant effects                                                                                    |
| Fig 4b<br>Mod trace test<br>Female Val/Val     | p = 0.307<br>F(5,25,126.01) = 1.212<br>np2 = 0.048           | p = 0.5817<br>F(1,24) = 0.3119<br>np2 = 0.013        | None                                                                           | No significant effects                                                                                    |
| Fig 4c<br>Mod trace training<br>Female Met/Met | p = 0.764<br>F(6,521,163.02) = 0.574<br>np2 = 0.022          | <b>p = 0.0433*</b><br>F(1,25) = 4.531<br>np2 = 0.153 | None                                                                           | No significant effects                                                                                    |
| Fig 4d<br>Mod trace test<br>Female Met/Met     | p = 0.498<br>F(7,132,178.296) = 0.914<br>np2 = 0.035         | p = 0.4189<br>F(1,25) = 0.6756<br>np2 = 0.026        | None                                                                           | No significant effects                                                                                    |
| Fig 4e<br>Mod trace training<br>Male Val/Val   | p = 0.341<br>F(5,525,143.639) = 1.143<br>np2 = 0.042         | p = 0.3687<br>F(1,26) = 0.8363<br>np2 = 0.031        | None                                                                           | No significant effects                                                                                    |
| Fig 4f<br>Mod trace test<br>Male Val/Val       | <b>p = 0.043*</b><br>F(5,777,150.195) = 3.253<br>np2 = 0.080 | p = 0.8166<br>F(1,26) = 0.05491<br>np2 = 0.002       | 200s                                                                           | <b>p = 0.0167*</b><br>CI = 1.992 to 43.68<br>g = 0.75                                                     |
| Fig 4g<br>Mod trace training<br>Male Met/Met   | p = 0.72<br>F(5,589,111.787) = 0.598<br>np2 = 0.029          | p = 0.1080<br>F(1,20) = 2.83<br>np2 = 0.124          | None                                                                           | No significant effects                                                                                    |
| Fig 4h<br>Mod trace test<br>Male Met/Met       | p = 0.137<br>F(5,666,113.327) = 1.675<br>np2 = 0.077         | p = 0.0716<br>F(1,20) = 3.619<br>np2 = 0.153         | 440s                                                                           | <b>p = 0.0022**</b><br>CI = 7.856 to 69.88<br>g = 1.13                                                    |
|                                                |                                                              |                                                      | 560s                                                                           | <b>p = 0.0141*</b><br>CI = 3.406 to 65.43<br>g = 1.05                                                     |

**Supplemental Table 3.** Detailed statistics from repeated measures two-way (time X exposure) ANOVAs from trace fear-conditioning experiments (Figures 3-4). F ratios, p values, and effect sizes as partial eta squared ( $\eta_p^2$ ) for effect of exposure, as well as for the interaction between time and exposure are shown. Significant individual time points discovered from planned comparison analyses of exposure effect within genotype, as well as Sidak multiplicity adjusted p values, 95% confidence intervals, and Hedges' g effect sizes are also presented.
