# Supplementary material
Source: PubMed Central journal article supplement (PMC6291361)
Supplement: NIHMS999802-supplement-Supp_TableS4.pdf [file NIHMS999802-supplement-Supp_TableS4.pdf]

| Figure                                  | p, F, np2 stats: Interaction<br><br>(Time X Genotype)               | p, F, np2 stats: Genotype                             | Significant time points<br><br>from multiple comparison | Multiple comparison Sidak<br>adjusted p value with 95% CI<br>and Hedges' g;<br><br>Genotype effect within air<br>exposed animals |
|-----------------------------------------|---------------------------------------------------------------------|-------------------------------------------------------|---------------------------------------------------------|----------------------------------------------------------------------------------------------------------------------------------|
| Fig 3ac<br>Reg trace training<br>Female | <b>p = 0.040*</b><br>F(4,815,86.675) = 2.472<br>np2 = 0.121         | <b>p = 0.030*</b><br>F(1,18) = 5.554<br>np2 = 0.236   | t = 666 s                                               | <b>p = 0.0101*</b><br>CI = -61.58 to -4.664<br>g = 1.74                                                                          |
| Fig 3eg<br>Reg trace training<br>Male   | <b>p = 0.004**</b><br>F(4,454,80.174) = 2.057<br>np2 = 0.184        | <b>p = 0.0025**</b><br>F(1,18) = 11.3<br>np2 = 0.406  | t = 666 s                                               | <b>p = 0.0097**</b><br>CI = -64.37 to -4.996<br>g = 1.82                                                                         |
|                                         |                                                                     |                                                       | t = 846 s                                               | <b>p = 0.0457*</b><br>CI = -59.67 to -0.2923<br>g = 1.40                                                                         |
|                                         |                                                                     |                                                       | t = 888 s                                               | <b>p = 0.0043**</b><br>CI = -66.63 to -7.258<br>g = 1.83                                                                         |
|                                         |                                                                     |                                                       | t = 1068 s                                              | <b>p = 0.0002***</b><br>CI = -74.69 to -15.31<br>g = 2.02                                                                        |
|                                         |                                                                     |                                                       | t = 1110 s                                              | <b>p = 0.0444*</b><br>CI = -59.76 to -0.3843<br>g = 1.04                                                                         |
|                                         |                                                                     |                                                       | t = 1290 s                                              | <b>p = 0.0439*</b><br>CI = -59.8 to -0.4267<br>g = 0.94                                                                          |
| Fig 3bd<br>Reg trace test<br>Female     | <b>p = 0.005**</b><br>F(4,181,75.265) = 3.982<br>np2 = 0.181        | <b>p = 0.0130*</b><br>F(1,18) = 7.595<br>np2 = 0.297  | t = 220 s                                               | <b>p &lt; 0.0001****</b><br>CI = -68.89 to -26.23<br>g = 1.50                                                                    |
|                                         |                                                                     |                                                       | t = 240 s                                               | <b>p = 0.0088**</b><br>CI = -46.18 to -3.517<br>g = 1.13                                                                         |
|                                         |                                                                     |                                                       | t = 340 s                                               | <b>p = 0.0002***</b><br>CI = -52.5 to -9.837<br>g = 1.06                                                                         |
|                                         |                                                                     |                                                       | t = 360 s                                               | <b>p = 0.0029**</b><br>CI = -48.2 to -5.537<br>g = 1.05                                                                          |
| Fig 3fh<br>Reg trace test<br>Male       | <b>p = 0.039*</b><br>F(3,324,59.838) = 2.872<br>np2 = 0.138         | <b>p = 0.0082**</b><br>F(1,18) = 8.837<br>np2 = 0.329 | t = 200 s                                               | <b>p = 0.0154*</b><br>CI = -44.56 to -2.402<br>g = 0.76                                                                          |
|                                         |                                                                     |                                                       | t = 240 s                                               | <b>p = 0.0005***</b><br>CI = -50.71 to -8.552<br>g = 0.83                                                                        |
|                                         |                                                                     |                                                       | t = 340 s                                               | <b>p &lt; 0.0001****</b><br>CI = -54.45 to -12.29<br>g = 1.00                                                                    |
|                                         |                                                                     |                                                       | t = 360 s                                               | <b>p = 0.0088**</b><br>CI = -45.64 to -3.482<br>g = 1.00                                                                         |
| Fig 4ac<br>Mod trace training<br>Female | p = 0.788<br>F(6,394,134.281) = 0.5395<br>np2 = 0.025               | p = 0.9972<br>F(1,21) < 0.001<br>np2 < 0.001          | None                                                    | N/A                                                                                                                              |
| Fig 4eg<br>Mod trace training<br>male   | p = 0.351<br>F(19,363) = 1.128<br>np2 = 0.056                       | p = 0.0881<br>F(1,19) = 3.233<br>np2 = 0.145          | 5th shock                                               | <b>p = 0.0357*</b><br>CI = -63.38 to -1.072<br>g = 0.76                                                                          |
| Fig 4bd<br>Mod trace test<br>Female     | p = 0.674<br>F(6,390,134.200) = 0.6819<br>np2 = 0.031               | p = 0.9433<br>F(1,21) = 0.005<br>np2 < 0.001          | None                                                    | N/A                                                                                                                              |
| Fig 4fh<br>Mod trace test<br>Male       | <b>p &lt; 0.0001****</b><br>F(6,825,129.671) = 11.33<br>np2 = 0.374 | <b>p = 0.0264*</b><br>F(1,19) = 5.799<br>np2 = 0.234  | t = 180                                                 | <b>p = 0.130*</b><br>CI = 3.244 to 58.76<br>g = 1.84                                                                             |
|                                         |                                                                     |                                                       | t = 220                                                 | <b>p &lt; 0.0001****</b><br>CI = -80.73 to -25.22<br>g = 2.68                                                                    |
|                                         |                                                                     |                                                       | t = 240                                                 | <b>p &lt; 0.0001****</b><br>-74.66 to -19.14<br>CI = 1.62                                                                        |
|                                         |                                                                     |                                                       | t = 320                                                 | <b>p &lt; 0.0001****</b><br>CI = -81.87 to -26.36<br>g = 2.11                                                                    |
|                                         |                                                                     |                                                       | t = 340                                                 | <b>p = 0.0001***</b><br>CI = -68.4 to -12.89<br>g = 1.36                                                                         |
|                                         |                                                                     |                                                       | t = 420                                                 | <b>p = 0.0017**</b><br>CI = -63.14 to -7.625<br>g = 1.46                                                                         |
|                                         |                                                                     |                                                       | t = 440                                                 | <b>p &lt; 0.0001****</b><br>CI = -90.18 to -34.67<br>g = 2.79                                                                    |
|                                         |                                                                     |                                                       | t = 520                                                 | <b>p = 0.0022**</b><br>CI = -4.012 to 59.52<br>g = 1.18                                                                          |
|                                         |                                                                     |                                                       | t = 540                                                 | <b>p = 0.0022**</b><br>CI = -62.62 to -7.103<br>g = 1.23                                                                         |
|                                         |                                                                     |                                                       | t = 560                                                 | <b>p &lt; 0.0001****</b><br>CI = -79.96 to -24.45<br>g = 1.76                                                                    |
|                                         |                                                                     |                                                       | t = 660                                                 | <b>p &lt; 0.0001****</b><br>CI = -75.08 to -19.57<br>g = 1.99                                                                    |
|                                         |                                                                     |                                                       | t = 680                                                 | <b>p = 0.0132*</b><br>CI = -58.72 to -3.212<br>g = 1.20                                                                          |

**Supplemental Table 4.** Analysis of effects of BDNF genotype in air exposed animals from repeated measures two-way (time X BDNF genotype) ANOVAs from trace fear-conditioning experiments (Figures 3-4). Detailed statistics, including F ratios, p values, and effect sizes as partial eta squared ( $\eta_p^2$ ) are shown for the effects of BDNF genotype, as well as the interaction of BDNF genotype and time point are presented. Planned comparison tests examining the effect of genotype at individual time bins were conducted, and significant Sidak multiplicity adjusted p values with 95% confidence intervals and Hedges' g effect sizes are also presented.
