# Supplementary material
Source: PubMed Central journal article supplement (PMC6291361)
Supplement: NIHMS999802-supplement-Supp_TableS5.pdf [file NIHMS999802-supplement-Supp_TableS5.pdf]

| Figure                              | $p, F, \eta_p^2$ stats: time                                          | $p, F, \eta_p^2$ stats: Genotype                            | $p, F, \eta_p^2$ stats: Exposure                       | $p, F, \eta_p^2$ stats: Time X Genotype                              | $p, F, \eta_p^2$ stats: Time X Exposure                         | $p, F, \eta_p^2$ stats: Genotype X Exposure           | $p, F, \eta_p^2$ stats: Time X Exposure X Genotype                 |
|-------------------------------------|-----------------------------------------------------------------------|-------------------------------------------------------------|--------------------------------------------------------|----------------------------------------------------------------------|-----------------------------------------------------------------|-------------------------------------------------------|--------------------------------------------------------------------|
| 3ac<br>Reg trace training<br>Female | $p < 0.001^{***}$<br>F(6.647,239.307) = 85.516,<br>$\eta_p^2 = 0.704$ | $p = 0.002^{**}$<br>F(1,36) = 11.456<br>$\eta_p^2 = 0.241$  | $p = 0.905$<br>F(1,36) = 0.014<br>$\eta_p^2 < 0.001$   | $p < 0.001^{***}$<br>F(6.647,239.307) = 4.496<br>$\eta_p^2 = 0.111$  | $p = 0.433$<br>F(6.647,239.307) = 0.995<br>$\eta_p^2 = 0.027$   | $p = 0.658$<br>F(1,36) = 0.199<br>$\eta_p^2 = 0.006$  | $p = 0.955$<br>F(6.647,239.307) = 0.284<br>$\eta_p^2 = 0.008$      |
| 3bd<br>Reg trace test<br>Female     | $p < 0.001^{***}$<br>F(4.338,156.177) = 38.883<br>$\eta_p^2 = 0.519$  | $p < 0.001^{***}$<br>F(1,36) = 14.505<br>$\eta_p^2 = 0.287$ | $p = 0.033^*$<br>F(1,36) = 0.4915<br>$\eta_p^2 = 0.12$ | $p = 0.001^{***}$<br>F(4.338,156.177) = 4.861<br>$\eta_p^2 = 0.119$  | $p = 0.015^*$<br>F(4.338,156.177) = 3.076<br>$\eta_p^2 = 0.079$ | $p = 0.718$<br>F(1,36) = 0.132<br>$\eta_p^2 = 0.004$  | $p = 0.385$<br>F(4.338,156.177) = 1.051<br>$\eta_p^2 = 0.028$      |
| 3eg<br>Reg trace training<br>Male   | $p < 0.001^{***}$<br>F(5.959,214.512) = 62.143<br>$\eta_p^2 = 0.633$  | $p = 0.002^{**}$<br>F(1,36) = 11.268<br>$\eta_p^2 = 0.238$  | $p = 0.501$<br>F(1,36) = 0.462<br>$\eta_p^2 = 0.013$   | $p = 0.001^{***}$<br>F(5.959,214.512) = 3.787<br>$\eta_p^2 = 0.095$  | $p = 0.342$<br>F(5.959,214.512) = 1.137<br>$\eta_p^2 = 0.031$   | $p = 0.036^*$<br>F(1,36) = 4.74<br>$\eta_p^2 = 0.116$ | $p = 0.189$<br>F(5.959,214.512) = 1.474<br>$\eta_p^2 = 0.039$      |
| 3fh<br>Reg trace test<br>Male       | $p < 0.001^{***}$<br>F(3.038,109.385) = 47.887<br>$\eta_p^2 = 0.571$  | $p = 0.006^{**}$<br>F(1,36) = 8.574<br>$\eta_p^2 = 0.192$   | $p = 0.076$<br>F(1,36) = 3.328<br>$\eta_p^2 = 0.085$   | $p = 0.072$<br>F(3.038,109.385) = 2.384<br>$\eta_p^2 = 0.062$        | $p = 0.108$<br>F(3.038,109.385) = 2.069<br>$\eta_p^2 = 0.054$   | $p = 0.163$<br>F(1,36) = 2.031<br>$\eta_p^2 = 0.053$  | $p = 0.219$<br>F(3.038,109.385) = 1.497<br>$\eta_p^2 = 0.040$      |
| 4ac<br>Mod trace training<br>Female | $p < 0.001^{***}$<br>F(7.262,355.829) = 58.227<br>$\eta_p^2 = 0.543$  | $p = 0.134$<br>F(1,49) = 2.324<br>$\eta_p^2 = 0.045$        | $p = 0.164$<br>F(1,49) = 1.992<br>$\eta_p^2 = 0.039$   | $p = 0.265$<br>F(7.262,355.829) = 1.265<br>$\eta_p^2 = 0.025$        | $p = 0.895$<br>F(7.262,355.829) = 0.42<br>$\eta_p^2 = 0.009$    | $p = 0.132$<br>F(1,49) = 2.34<br>$\eta_p^2 = 0.046$   | $p = 0.725$<br>F(7.262,355.829) = 0.644<br>$\eta_p^2 = 0.013$      |
| 4bd<br>Mod trace test<br>Female     | $p < 0.001^{***}$<br>F(7.25,355.249) = 34.581<br>$\eta_p^2 = 0.414$   | $p = 0.279$<br>F(1,49) = 1.198<br>$\eta_p^2 = 0.024$        | $p = 0.802$<br>F(1,49) = 0.064<br>$\eta_p^2 = 0.001$   | $p = 0.404$<br>F(7.25,355.249) = 1.039<br>$\eta_p^2 = 0.021$         | $p = 0.162$<br>F(7.25,355.249) = 1.505<br>$\eta_p^2 = 0.030$    | $p = 0.33$<br>F(1,49) = 0.966<br>$\eta_p^2 = 0.019$   | $p = 0.72$<br>F(7.25,355.249) = 0.649<br>$\eta_p^2 = 0.013$        |
| 4eg<br>Mod trace training<br>Male   | $p < 0.001^{***}$<br>F(6.435,296.032) = 57.799<br>$\eta_p^2 = 0.557$  | $p = 0.124$<br>F(1,46) = 2.449<br>$\eta_p^2 = 0.051$        | $p = 0.058$<br>F(1,46) = 3.772<br>$\eta_p^2 = 0.076$   | $p = 0.449$<br>F(6.435,296.032) = 0.97<br>$\eta_p^2 = 0.021$         | $p = 0.455$<br>F(6.435,296.032) = 0.962<br>$\eta_p^2 = 0.02$    | $p = 0.41$<br>F(1,46) = 0.692<br>$\eta_p^2 = 0.015$   | $p = 0.651$<br>F(6.435,296.032) = 0.711<br>$\eta_p^2 = 0.015$      |
| 4fh<br>Mod trace test<br>Male       | $p < 0.001^{***}$<br>F(7.526,346.196) = 35.149<br>$\eta_p^2 = 0.433$  | $p = 0.021^*$<br>F(1,46) = 5.666<br>$\eta_p^2 = 0.110$      | $p = 0.065$<br>F(1,46) = 3.573<br>$\eta_p^2 = 0.072$   | $p < 0.001^{***}$<br>F(7.526,346.196) = 11.052<br>$\eta_p^2 = 0.194$ | $p = 0.522$<br>F(7.526,346.196) = 0.888<br>$\eta_p^2 = 0.019$   | $p = 0.104$<br>F(1,46) = 2.743<br>$\eta_p^2 = 0.056$  | $p = 0.003^{**}$<br>F(7.526,346.196) = 3.054<br>$\eta_p^2 = 0.062$ |

**Supplemental Table 5.** Detailed statistics from BDNF genotype X exposure condition X time three-way repeated measures ANOVAs from both the regular and modified trace fear conditioning paradigms. Statistics presented include F ratios, p values, and effect size as partial eta squared ( $\eta_p^2$ ).
