# Supplementary material
Source: PubMed Central journal article supplement (PMC6291361)
Supplement: NIHMS999802-supplement-Supp_TableS6.pdf [file NIHMS999802-supplement-Supp_TableS6.pdf]

| Figure                                                           | p, F, and np2 stats: Interaction<br>(Genotype X Exposure) | p, F, and np2 stats: Genotype                           | p, F, and np2 stats: Exposure                        | Multiple comparison Sidak adjusted p value with 95% CI and Hedges' g :<br>Exposure effect in val/val | Multiple comparison Sidak adjusted p value with 95% CI and Hedges' g :<br>Exposure effect in met/met | Multiple comparison Sidak adjusted p value with 95% CI and Hedges' g :<br>Genotype effect in air exposed animals |
|------------------------------------------------------------------|-----------------------------------------------------------|---------------------------------------------------------|------------------------------------------------------|------------------------------------------------------------------------------------------------------|------------------------------------------------------------------------------------------------------|------------------------------------------------------------------------------------------------------------------|
| Supplemental Figure 2a<br>Pup weights<br>P2                      | p = 0.8294<br>F(1,52) = 0.0469<br>np2 = 0.001             | p = 0.2147<br>F(1,52) = 1.578<br>np2 = 0.029            | p = 0.0808<br>F(1,52) = 3.171<br>np2 = 0.057         | p = 0.3575<br>CI = -0.2222 to 0.06164<br>g = 0.51                                                    | p = 0.4050<br>CI = -0.1817 to 0.05598<br>g = 0.43                                                    | p = 0.7110<br>CI = -0.08818 to 0.1718<br>g = 0.34                                                                |
| Supplemental Figure 2a<br>Pup weights<br>P5                      | p = 0.2618<br>F(1,52) = 1.287<br>np2 = 0.024              | p = 0.0899<br>F(1,52) = 2.987<br>np2 = 0.054            | p = 0.9073<br>F(1,52) = 0.01369<br>np2 < 0.001       | p = 0.6614<br>CI = -0.1815 to 0.3808<br>g = 0.32                                                     | p = 0.6770<br>CI = -0.3165 to 0.1544<br>g = 0.29                                                     | p = 0.0910<br>CI = -0.02952 to 0.4854<br>g = 0.8                                                                 |
| Supplemental Figure 2a<br>Pup weights<br>P10                     | p = 0.3257<br>F(1,46) = 0.9868<br>np2 = 0.021             | p = 0.1699<br>F(1,46) = 1.945<br>np2 = 0.041            | <b>p = 0.0334*</b><br>F(1,46) = 4.811<br>np2 = 0.095 | p = 0.6623<br>CI = -0.382 to 0.7986<br>g = 0.44                                                      | <b>p = 0.0454*</b><br>CI = 0.009543 to 1.097<br>g = 0.76                                             | p = 0.9497<br>CI = -0.4922 to 0.6314<br>g = 0.14                                                                 |
| Supplemental Figure 2a<br>Pup weights<br>P15                     | p = 0.4281<br>F(1,40) = 0.6408<br>np2 = 0.016             | p = 0.3409<br>F(1,40) = 0.9289<br>np2 = 0.023           | p = 0.1563<br>F(1,40) = 2.087<br>np2 = 0.050         | p = 0.8861<br>CI = -0.6149 to 0.902<br>g = 0.23                                                      | p = 0.2023<br>CI = -0.2044 to 1.205<br>g = 0.58                                                      | p = 0.9907<br>CI = -0.6551 to 0.7278<br>g = 0.07                                                                 |
| Supplemental Figure 2b<br>Female weights<br>P50                  | p = 0.2453<br>F(1,95) = 1.367<br>np2 = 0.014              | p = 0.0807<br>F(1,95) = 3.117<br>np2 = 0.032            | p = 0.0548<br>F(1,95) = 3.782<br>np2 = 0.038         | p = 0.8494<br>CI = -0.6313 to 0.9957<br>g = 0.13                                                     | <b>p = 0.0361*</b><br>CI = 0.03982 to 1.424<br>g = 0.80                                              | p = 0.9087<br>CI = -0.6775 to 0.9578<br>g = 0.11                                                                 |
| Supplemental Figure 2b<br>Female weights<br>P90                  | p = 0.5337<br>F(1,87) = 0.3904<br>np2 = 0.004             | p = 0.1004<br>F(1,87) = 2.757<br>np2 = 0.031            | p = 0.5917<br>F(1,87) = 0.2899<br>np2 = 0.003        | p = 0.6697<br>CI = -0.7895 to 1.647<br>g = 0.2                                                       | p = 0.9975<br>CI = -1.186 to 1.122<br>g = 0.02                                                       | p = 0.2173<br>CI = -0.3628 to 2.048<br>g = 0.65                                                                  |
| Supplemental Figure 2b Male<br>weights<br>P50                    | p = 0.4720<br>F(1,80) = 0.5223<br>np2 = 0.006             | p = 0.8631<br>F(1,80) = 0.02991<br>np2 < 0.001          | <b>p = 0.0332*</b><br>F(1,80) = 4.695<br>np2 = 0.055 | <b>p = 0.0446*</b><br>CI = 0.02142 to 2.11<br>g = 0.81                                               | p = 0.59<br>CI = -0.7849 to 1.85<br>g = 0.24                                                         | p = 0.9012<br>CI = -0.9347 to 1.34<br>g = 0.14                                                                   |
| Supplemental Figure 2b<br>Male<br>P90                            | p = 0.7589<br>F(1,75) = 0.09493<br>np2 = 0.001            | p = 0.1455<br>F(1,75) = 2.163<br>np2 = 0.028            | <b>p = 0.0478*</b><br>F(1,75) = 4.048<br>np2 = 0.051 | p = 0.3461<br>CI = -0.8163 to 3.05<br>g = 0.41                                                       | p = 0.2478<br>CI = -0.7624 to 3.804<br>g = 0.52                                                      | p = 0.4338<br>CI = -3.449 to 1.117<br>g = 0.52                                                                   |
| Supplemental Figure 2c<br>Righting Reflex                        | <b>p = 0.0378*</b><br>F(1,32) = 4.697<br>np2 = 0.128      | p = 0.5194<br>F(1,32) = 0.4245<br>np2 = 0.013           | p = 0.8747<br>F(1,32) = 0.02526<br>np2 = 0.001       | p = 0.2778<br>CI = -0.689 to 3.019<br>g = 0.62                                                       | p = 0.2291<br>CI = -3.342 to 0.6436<br>g = 0.80                                                      | p = 0.4731<br>CI = -0.9747 to 2.733<br>g = 0.49                                                                  |
| Supplemental Figure 2c<br>Eye Opening                            | p = 0.8988<br>F(1,32) = 0.01642<br>np2 = 0.001            | p = 0.9524<br>F(1,32) = 0.003617<br>np2 < 0.001         | p = 0.5064<br>F(1,32) = 0.4516<br>np2 = 0.014        | p = 0.8073<br>CI = -0.933 to 0.5594<br>g = 0.34                                                      | p = 0.9175<br>CI = -0.9291 to 0.6752<br>g = 0.14                                                     | p = 0.9881<br>CI = -0.7902 to 0.7023<br>g = 0.06                                                                 |
| Supplemental Figure 2c<br>Auditory Startle                       | p = 0.0682<br>F(1,32) = 3.563<br>np2 = 0.100              | p = 0.2471<br>F(1,32) = 1.39<br>np2 = 0.042             | p = 0.6804<br>F(1,32) = 0.1728<br>np2 = 0.005        | p = 0.4930<br>CI = -0.4634 to 1.255<br>g = 0.52                                                      | p = 0.2354<br>CI = -1.542 to 0.3044<br>g = 0.83                                                      | p = 0.0618<br>CI = -0.03483 to 1.683<br>g = 1.03                                                                 |
| Supplemental Figure 2c<br>Ear Twitch                             | p = 0.5195<br>F(1,32) = 0.4241<br>np2 = 0.013             | p = 0.2425<br>F(1,32) = 1.418<br>np2 = 0.042            | p = 0.9332<br>F(1,32) = 0.07135<br>np2 < 0.001       | p = 0.8343<br>CI = -0.8809 to 0.5513<br>g = 0.22                                                     | p = 0.9108<br>CI = -0.6428 to 0.8968<br>g = 0.23                                                     | p = 0.9068,<br>CI = -0.5952 to 0.837<br>g = 0.18                                                                 |
| Supplemental Figure 3a<br>CA1 volume (P50)<br>Female             | p = 0.6827<br>F(1,28) = 0.1706<br>np2 = 0.006             | <b>p = 0.0447*</b><br>F(1,28) = 4.419<br>np2 = 0.136    | <b>p = 0.0291*</b><br>F(1,28) = 5.291<br>np2 = 0.159 | p = 0.1263<br>CI = -63051668 to 6540168<br>g = 1.18                                                  | p = 0.3484<br>CI = -54448168 to 15143668<br>g = 0.53                                                 | p = 0.4260<br>CI = -17206168 to 52385668<br>g = 0.68                                                             |
| Supplemental Figure 3b<br>CA3 volume (P50)<br>Female             | p = 0.4666<br>F(1,28) = 0.5447<br>np2 = 0.019             | p = 0.0505<br>F(1,28) = 4.175<br>np2 = 0.130            | p = 0.5797<br>F(1,28) = 0.314<br>np2 = 0.011         | p = 0.5986<br>CI = -47433838 to 20886963<br>g = 0.41                                                 | p = 0.9902<br>CI = -32344151 to 35976651<br>g = 0.06                                                 | p = 0.5954<br>CI = -20816651 to 47504151<br>g = 0.50                                                             |
| Supplemental Figure 3c<br>DG volume (P50)<br>Female              | p = 0.1791<br>F(1,28) = 0.06071<br>np2 = 0.002            | <b>p = 0.0247*</b><br>F(1,28) = 5.636<br>np2 = 0.168    | p = 0.6542<br>F(1,28) = 0.205<br>np2 = 0.007         | p = 0.8593<br>CI = -51726365 to 79097990<br>g = 0.24                                                 | p = 0.9868<br>CI = -61372928 to 69451428<br>g = 0.07                                                 | p = 0.1434<br>CI = -14115178 to 116709178<br>g = 1.03                                                            |
| Supplemental Figure 3d<br>CA1 volume (P50)<br>Male               | p = 0.4013<br>F(1,28) = 0.7263<br>np2 = 0.025             | <b>p = 0.0370*</b><br>F(1,28) = 4.797<br>np2 = 0.146    | p = 0.8740<br>F(1,28) = 0.02562<br>np2 = 0.001       | p = 0.7296<br>CI = -68965942 to 36894942<br>g = 0.30                                                 | p = 0.8619<br>CI = -41965692 to 63895192<br>g = 0.27                                                 | p = 0.5803<br>CI = -31735317 to 74125567<br>g = 0.41                                                             |
| Supplemental Figure 3e<br>CA3 volume (P50)<br>Male               | p = 0.2328<br>F(1,28) = 1.488<br>np2 = 0.050              | p = 0.9919<br>F(1,28) = 0.0001<br>np2 < 0.001           | p = 0.4587<br>F(1,28) = 0.5645<br>np2 = 0.020        | p = 0.3183<br>CI = -67930682 to 17524432<br>g = 0.78                                                 | p = 0.9339<br>CI = -36739057 to 48716057<br>g = 0.14                                                 | p = 0.6396<br>CI = -58192557 to 27262557<br>g = 0.36                                                             |
| Supplemental Figure 3f<br>DG volume (P50)<br>Male                | <b>p = 0.0366*</b><br>F(1,28) = 4.818<br>np2 = 0.147      | <b>p = 0.0076**</b><br>F(1,28) = 8.283<br>np2 = 0.228   | p = 0.9247<br>F(1,28) = 0.0091<br>np2 < 0.001        | p = 0.2755<br>CI = -86227659 to 19680909<br>g = 0.66                                                 | p = 0.2195<br>CI = -16657409 to 89251159<br>g = 0.83                                                 | p = 0.8652<br>CI = -42130034 to 63778534<br>g = 0.22                                                             |
| Supplemental Figure 4a<br>Female Regular Trace<br>Jump reaction  | p = 0.938<br>F(1,36) = 0.006<br>np2 < 0.001               | <b>p = 0.0003***</b><br>F(1,36) = 16.2<br>np2 = 0.31    | p = 0.312<br>F(1,36) = 1.053<br>np2 = 0.028          | p = 0.686<br>CI = -1.391 to 2.791<br>g = 0.31                                                        | p = 0.757<br>CI = -1.491 to 2.691<br>g = 0.31                                                        | <b>p = 0.017*</b><br>CI = -4.591 to -0.4092<br>g = 1.04                                                          |
| Supplemental Figure 4b<br>Male Regular Trace<br>Jump reaction    | p = 0.131<br>F(1,36) = 2.393<br>np2 = 0.062               | <b>p = 0.002**</b><br>F(1,36) = 11.335<br>np2 = 0.239   | p = 0.181<br>F(1,36) = 1.863<br>np2 = 0.049          | p = 0.990<br>CI = -1.713 to 1.913<br>g = 0.06                                                        | p = 0.091<br>CI = -3.413 to 0.2134<br>g = 0.86                                                       | p = 0.370<br>CI = -2.813 to 0.8134<br>g = 0.52                                                                   |
| Supplemental Figure 4c<br>Female Regular Trace<br>Run reaction   | p > 0.999<br>F(1,36) < 0.001<br>np2 < 0.001               | <b>p = 0.004**</b><br>F(1,36) = 9.684<br>np2 = 0.212    | p = 0.517<br>F(1,36) = 0.429<br>np2 = 0.012          | p = 0.875<br>CI = -2.813 to 0.8134<br>g = 0.15                                                       | p = 0.875<br>CI = -2.415 to 1.615<br>g = 0.47                                                        | p = 0.067<br>CI = -3.915 to 0.1149<br>g = 0.84                                                                   |
| Supplemental Figure 4d<br>Male Regular Trace<br>Run Reaction     | p = 0.267<br>F(1,36) = 1.273<br>np2 = 0.034               | <b>p = 0.0003***</b><br>F(1,36) = 16.234<br>np2 = 0.311 | p = 0.523<br>F(1,36) = 0.416<br>np2 = 0.011          | p = 0.389<br>CI = -3.148 to 0.9477<br>g = 0.39                                                       | p = 0.930<br>CI = -1.748 to 2.348<br>g = 0.49                                                        | <b>p = 0.002**</b><br>CI = -5.248 to -1.152<br>g = 1.42                                                          |
| Supplemental Figure 4e<br>Female Modified Trace<br>Jump Reaction | p = 0.808<br>F(1,48) = 0.06<br>np2 = 0.001                | p = 0.262<br>F(1,48) = 1.29<br>np2 = 0.026              | p = 0.859<br>F(1,48) = 0.032<br>np2 = 0.001          | p = 0.999<br>CI = -1.175 to 1.223<br>g = 0.02                                                        | p = 0.945<br>CI = -1.343 to 1.034<br>g = 0.11                                                        | p = 0.801<br>CI = -1.587 to 0.9352<br>g = 0.26                                                                   |
| Supplemental Figure 4f<br>Male Modified Trace<br>Jump Reaction   | p = 0.102<br>F(1,46) = 2.78<br>np2 = 0.057                | p = 0.200<br>F(1,46) = 1.688<br>np2 = 0.035             | p = 0.190<br>F(1,46) = 1.766<br>np2 = 0.037          | p = 0.961<br>CI = -1.091 to 1.358<br>g = 0.09                                                        | p = 0.096<br>CI = -2.538 to 0.1714<br>g = 0.84                                                       | p = 0.964<br>CI = -1.237 to 1.528<br>g = 0.09                                                                    |
| Supplemental Figure 4g<br>Female Modified Trace<br>Run Reaction  | p = 0.515<br>F(1,48) = 0.431<br>np2 = 0.009               | p = 0.148<br>F(1,48) = 2.16<br>np2 = 0.043              | p = 0.537<br>F(1,48) = 0.387<br>np2 = 0.008          | p > 0.999<br>CI = -0.5863 to 0.5742<br>g = 0.01                                                      | p = 0.601<br>CI = -0.3489 to 0.8013<br>g = 0.29                                                      | p = 0.831<br>CI = -0.4663 to 0.7541<br>g = 0.28                                                                  |
| Supplemental Figure 4h<br>Male Modified Trace<br>Run Reaction    | p = 0.088<br>F(1,46) = 3.03<br>np2 = 0.062                | p = 0.179<br>F(1,46) = 1.858<br>np2 = 0.039             | p = 0.129<br>F(1,46) = 2.391<br>np2 = 0.049          | p = 0.987<br>CI = -0.6347 to 0.5598<br>g = 0.08                                                      | p = 0.063<br>CI = -0.02758 to 1.294<br>g = 0.72                                                      | p = 0.962<br>CI = -0.7472 to 0.6017<br>g = 0.16                                                                  |

Supplemental Table 6. Detailed statistics from BDNF genotype X exposure condition two-way ANOVAs from Supplemental Figures 2-4. The BDNF genotype X exposure interaction, genotype, and exposure p values, F ratios, and effect sizes as partial eta squared ( $\eta_p^2$ ) are shown. Planned comparison analyses of exposure condition within BDNF genotype, as well as of genotype effect within air exposed animals are also presented, with Sidak multiplicity adjusted p values, 95% confidence intervals, and Hedges' g effect sizes.
