# Supplementary material
Source: PubMed Central journal article supplement (PMC6291361)
Supplement: NIHMS999802-supplement-Supp_TableS7.pdf [file NIHMS999802-supplement-Supp_TableS7.pdf]

| <u>Measure</u>                            | <u>Effect</u>     | <u>p, F, np2 stats</u>                                           |
|-------------------------------------------|-------------------|------------------------------------------------------------------|
| CA1 Volume (P15)                          | Sex               | <b>p = 0.004**</b><br>F(1,56) = 9.103<br>np2 = 0.140             |
| DG Volume (P15)                           | Sex               | <b>p = 0.031*</b><br>F(1,56) = 4.886<br>np2 = 0.08               |
| Zero Maze<br>Open arm %                   | Sex               | <b>p = 0.010*</b><br>F(1,122) = 6.902<br>np2 = 0.054             |
| Zero Maze<br>Open arm %                   | Exposure*Sex      | <b>p = 0.007**</b><br>F(1,122) = 7.58<br>np2 = 0.058             |
| Zero Maze<br>Open entries                 | Sex               | <b>p = 0.007**</b><br>F(1,122) = 7.424<br>np2 = 0.057            |
| Zero Maze<br>Total distance               | Sex               | <b>p = 0.046*</b><br>F(1,122) = 4.047<br>np2 = 0.032             |
| Zero Maze<br>Velocity                     | Sex               | <b>p = 0.043*</b><br>F(1,122) = 4.201<br>np2 = 0.033             |
| Modified Trace Fear<br>Conditioning: Test | Genotype*Sex      | <b>p = 0.013*</b><br>F(1,95) = 6.391<br>np2 = 0.063              |
| Modified Trace Fear<br>Conditioning: Test | Genotype*Sex*Time | <b>p &lt; 0.001***</b><br>F(8.170,776.165)= 5.282<br>np2 = 0.053 |

**Supplemental Table 7.** Significant simple effects of sex, as well as significant interactions of sex with other experimental factors from all experiments. Statistics presented include F ratios, p values, and effect size as partial eta squared ( $\eta_p^2$ ).
