# Supplementary material
Source: PubMed Central journal article supplement (PMC6291361)

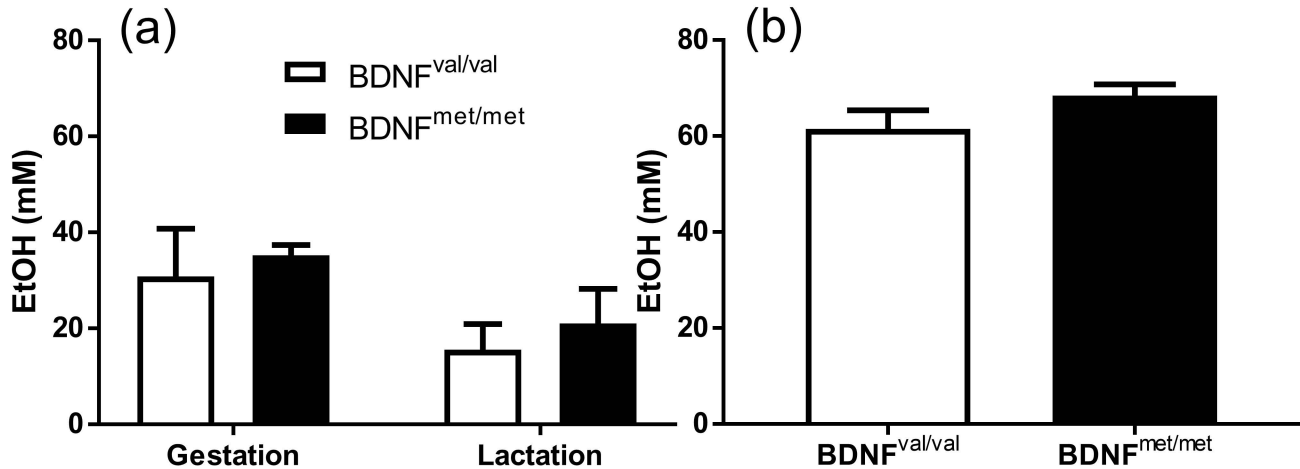

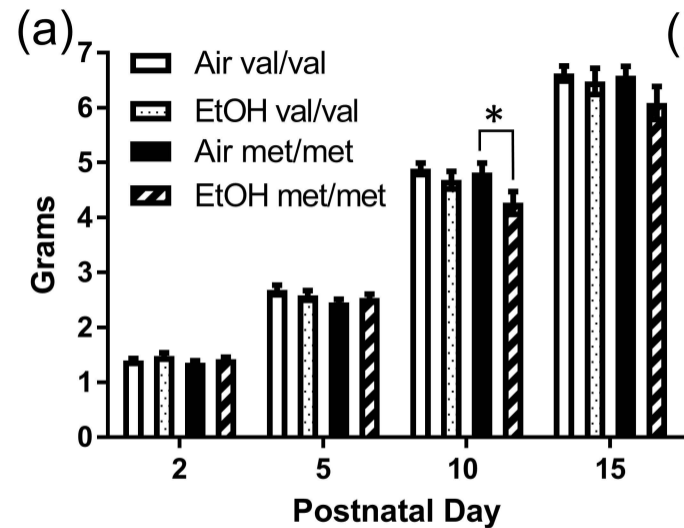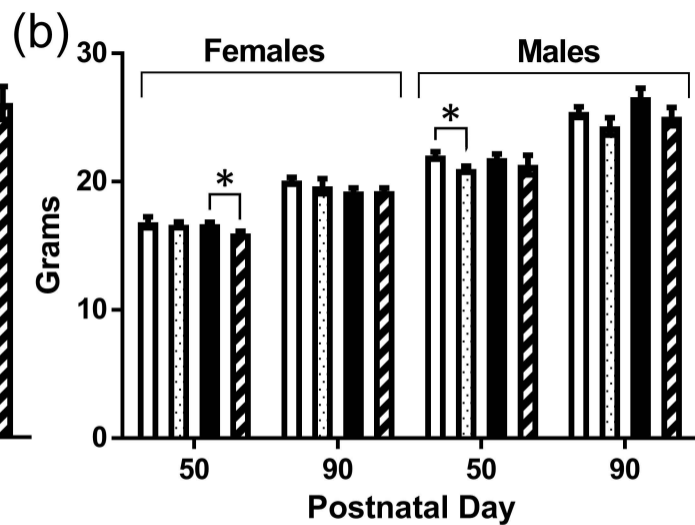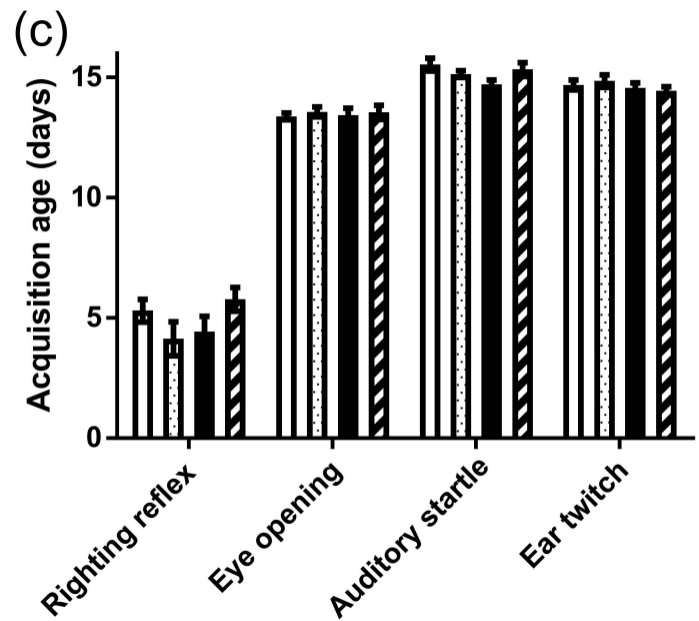

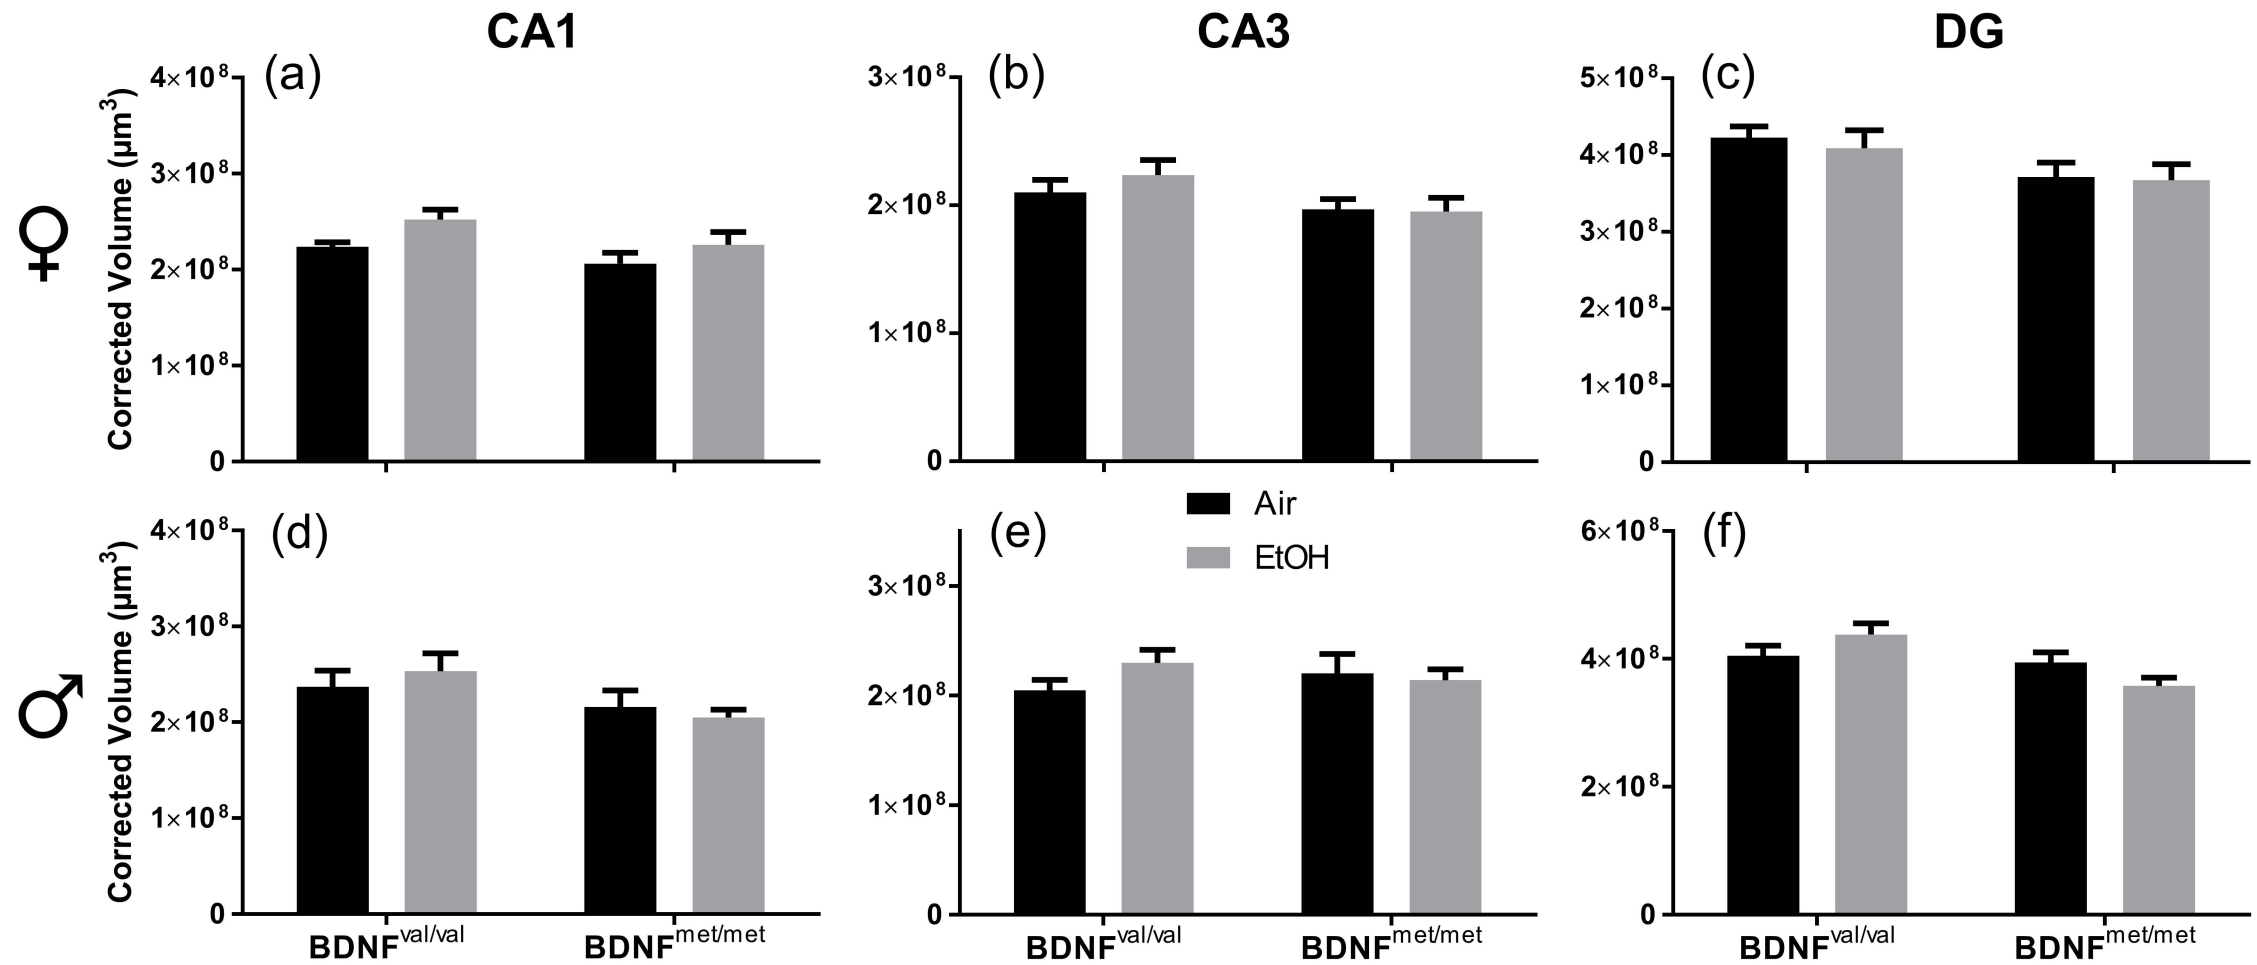

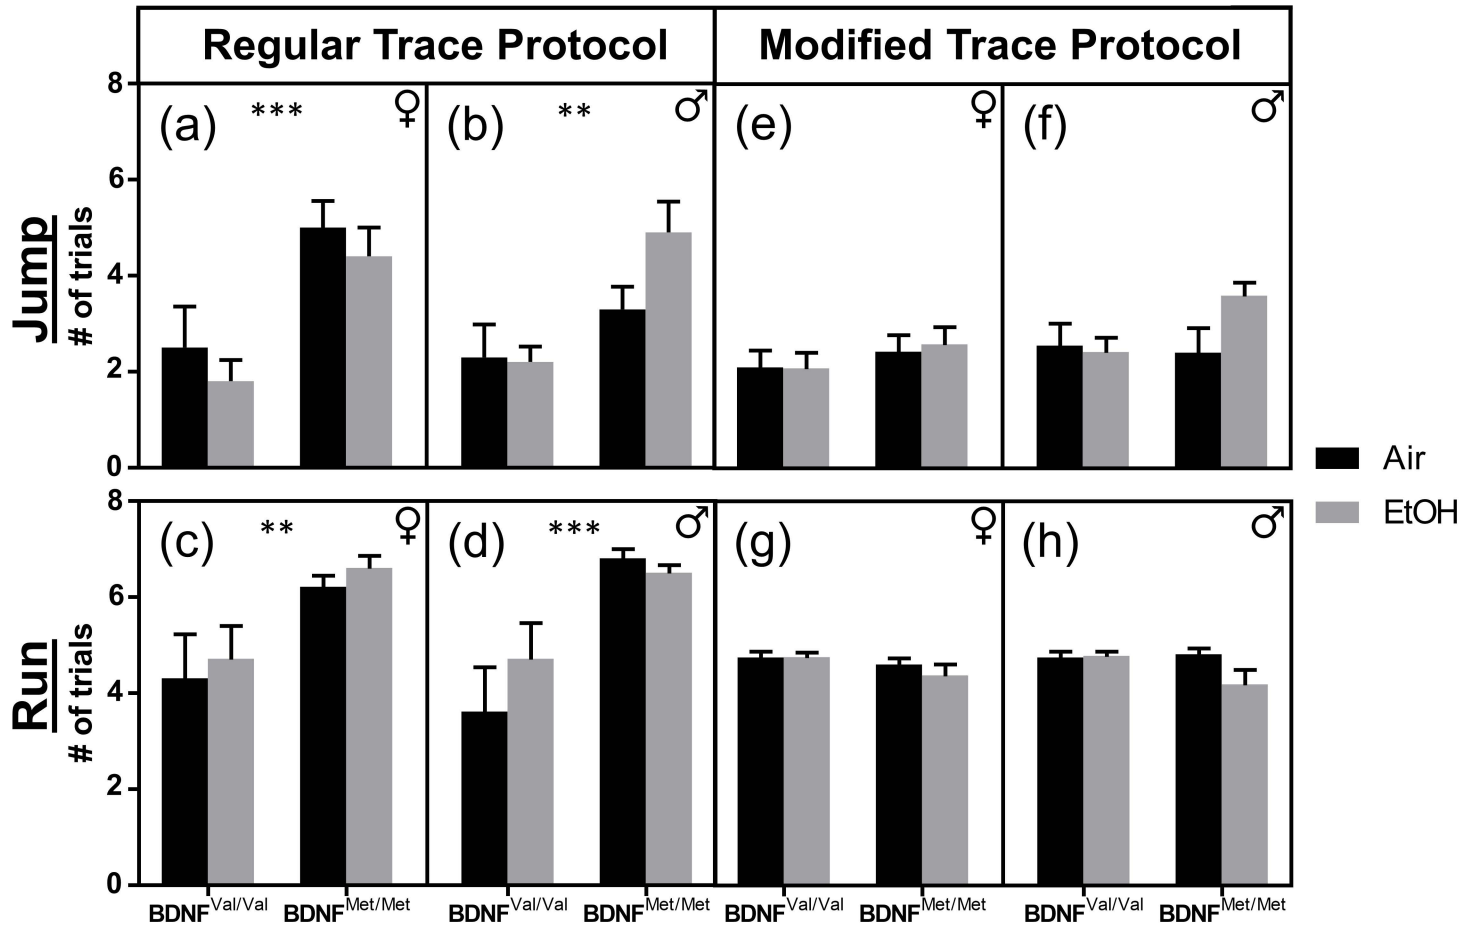

Supplement: NIHMS999802-supplement-Supp_figS1-4.pdf [file NIHMS999802-supplement-Supp_figS1-4.pdf]
